# Supplementary material
Source: PubMed Central journal article supplement (PMC4118742)

Similarity Plot of Aligned Sequences

BLD94442 similarity

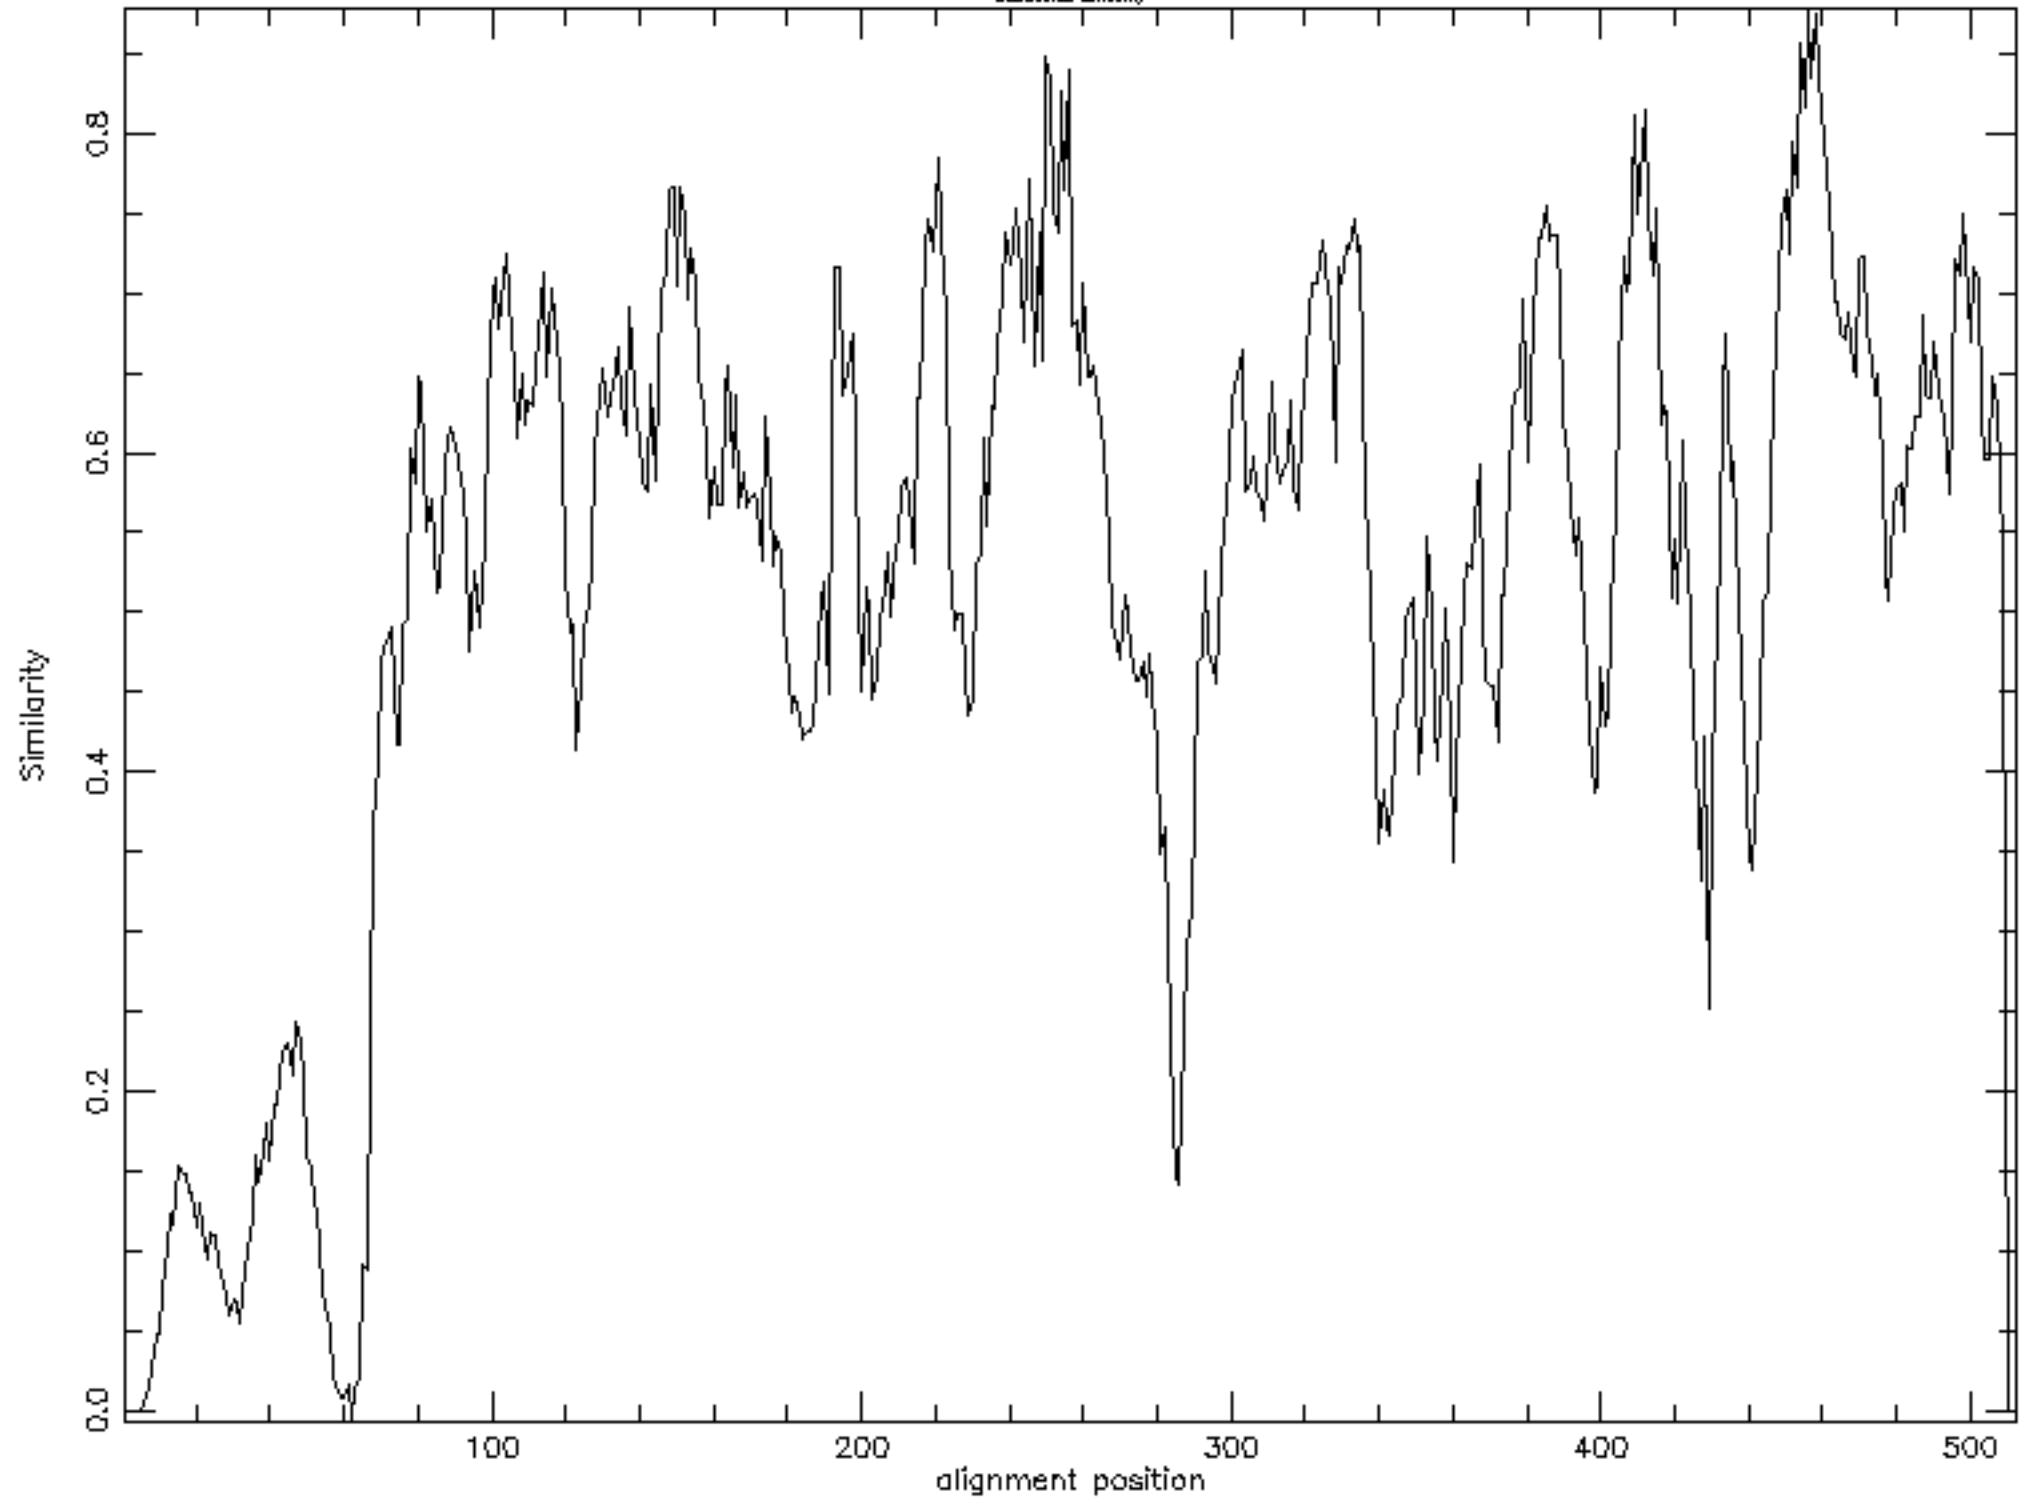

Supplement: NIHMS584470-supplement-03.pdf [file NIHMS584470-supplement-03.pdf]
